# Supplementary material for: Planar–rotor architecture based pyrene–vinyl–tetraphenylethylene conjugated systems: photophysical properties and aggregation behavior
Source: Royal Society of Chemistry journal article supplement (doi:10.1039/c5ob01564b), 2015-01-01

## Supporting Information

### **Planar-Rotor Architecture Based Pyrene-Vinyl-Tetraphenylethylene Conjugated Systems: Photophysical Properties and Aggregation Behavior**

Debabrata Jana,<sup>a</sup> Shatabdi Boxi,<sup>a</sup> Partha P. Parui,<sup>b</sup> and Binay K. Ghorai\*<sup>a</sup>

<sup>a</sup>*Department of Chemistry, Indian Institute of Engineering Science and Technology, Shibpur, Howrah 711 103, India*

<sup>b</sup>*Department of Chemistry, Jadavpur University, Kolkata 700 032, India*

Tel: +91-33-26684561; Fax: +91-33-26682916; E.mail: [binay@chem.iiests.ac.in](mailto:binay@chem.iiests.ac.in)

| <b>S.No</b> | <b>Contents</b>                     | <b>Page</b> |
|-------------|-------------------------------------|-------------|
| 1           | Aggregation data (UV-vis)           | 2–3         |
| 2           | Theoretical calculation data        | 4–22        |
| 3           | Copies of NMR and Mass spectroscopy | 23–32       |

## 1. Aggregation properties (UV-vis) of 8-10

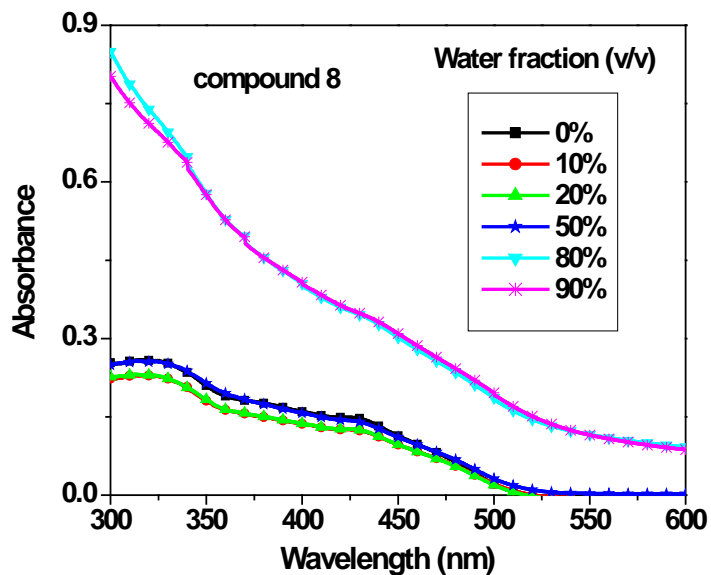

Fig. A Absorption spectra of 8 (10  $\mu$ M) in THF and with different amounts of water.

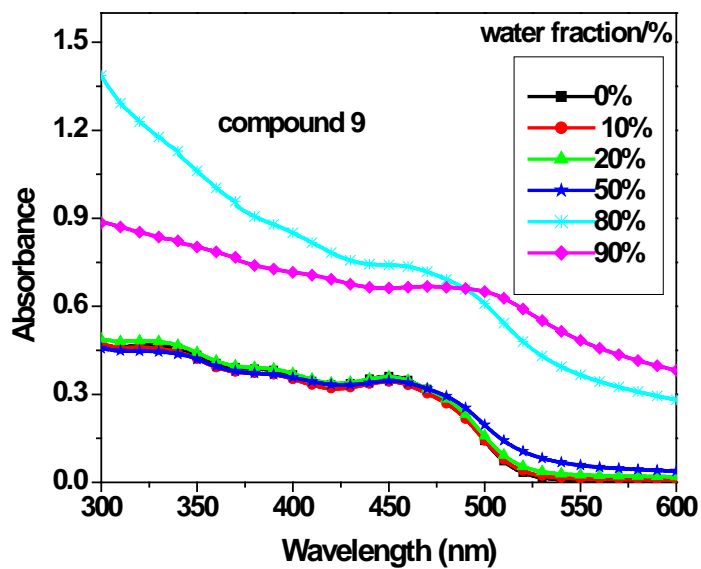

Fig. B Absorption spectra of 9 (10  $\mu$ M) in THF and with different amounts of water.

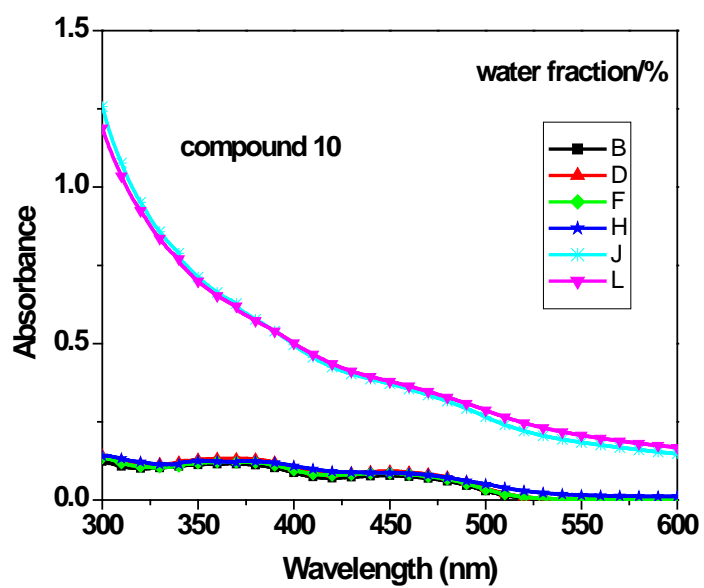

Fig. C Absorption spectra of **10** (10 μM) in THF and with different amounts of water.

## 2. Theoretical calculation data (HF/6-31G)

For Compound 7:

FOpt[RHF]6-31G|C44H30|PROF. GHORAI

|    | x              | y              | z             |
|----|----------------|----------------|---------------|
| C, | -5.703826418,  | -2.7145876124, | 6.1238070431  |
| C, | -4.3387570292, | -2.5214619568, | 6.2524474594  |
| C, | -3.5108443648, | -2.5418239624, | 5.1313514447  |
| C, | -4.0750491583, | -2.76228533,   | 3.8553904888  |
| C, | -5.4713378781, | -2.9549402948, | 3.7318907758  |
| C, | -6.2663057567, | -2.9286176733, | 4.8756989736  |
| C, | -2.0883660466, | -2.3347683309, | 5.22366905    |
| C, | -3.2371958236, | -2.7898742988, | 2.6920866763  |
| C, | -1.8379663894, | -2.6039354022, | 2.8137521333  |
| C, | -1.3017963,    | -2.3594500581, | 4.1341703817  |
| C, | -1.0282044095, | -2.641148647,  | 1.6624672647  |
| C, | -1.6322012953, | -2.855666057,  | 0.4238137295  |
| C, | -2.9971744099, | -3.025442951,  | 0.3008017097  |
| C, | -3.8205325602, | -3.0010386899, | 1.4220088987  |
| C, | -5.246980742,  | -3.1924687556, | 1.3271318519  |
| C, | -6.0289132701, | -3.1722387965, | 2.4189243442  |
| H, | -7.0894158753, | -3.3168893445, | 2.3350359241  |
| H, | -5.6716283202, | -3.3536303376, | 0.3542297961  |
| H, | -1.6645523116, | -2.1488711658, | 6.1925751962  |
| H, | -6.3299337979, | -2.6970179744, | 6.9949369441  |
| H, | -3.9087168505, | -2.3531115376, | 7.221782685   |
| H, | -7.3258863399, | -3.0757042525, | 4.7832244083  |
| H, | -0.252320998,  | -2.1766961768, | 4.2408616096  |
| H, | -1.0148024639, | -2.9189688846, | -0.4505160159 |
| H, | -3.4279994442, | -3.1949715712, | -0.6679994743 |
| C, | 0.4388991526,  | -2.4852919136, | 1.7473483977  |
| C, | 1.1823337638,  | -1.8185393097, | 0.8650890634  |

|    |                |                |               |
|----|----------------|----------------|---------------|
| H, | 0.9184955711,  | -2.9531171447, | 2.586860967   |
| H, | 0.688437946,   | -1.2949257978, | 0.0650654311  |
| C, | 2.6488359789,  | -1.6773239677, | 0.885904182   |
| C, | 3.243250421,   | -0.6423621435, | 0.1656243739  |
| C, | 3.4887764058,  | -2.5447928003, | 1.5881936647  |
| C, | 4.6159843269,  | -0.457719218,  | 0.169614685   |
| H, | 2.6249479963,  | 0.0305144127,  | -0.3987052163 |
| C, | 4.8596127183,  | -2.3656428776, | 1.5849576022  |
| H, | 3.0747842106,  | -3.3784924064, | 2.1210054393  |
| C, | 5.4497589468,  | -1.3089701403, | 0.8892728836  |
| H, | 5.0411098701,  | 0.3536221532,  | -0.387211442  |
| H, | 5.4817433191,  | -3.0586620385, | 2.1180032892  |
| C, | 6.9396933055,  | -1.1460042499, | 0.8760826379  |
| C, | 7.5531525664,  | 0.0076810877,  | 1.1953619992  |
| C, | 9.0251641048,  | 0.2285395559,  | 1.0080769188  |
| C, | 9.6320118598,  | 0.04774404,    | -0.2330820175 |
| C, | 9.8107109395,  | 0.6708910 281, | 2.0730362212  |
| C, | 10.9883439357, | 0.2857098483,  | -0.4021403942 |
| H, | 9.042647208,   | -0.282677271,  | -1.0654754568 |
| C, | 11.1676218562, | 0.8994507792,  | 1.9082380095  |
| H, | 9.3560289282,  | 0.8381775202,  | 3.0306223305  |
| C, | 11.7618796798, | 0.7075797183,  | 0.6684981111  |
| H, | 11.4365924079, | 0.1419542348,  | -1.3665832329 |
| H, | 11.7569877973, | 1.2302898191,  | 2.7419689803  |
| H, | 12.8114294788, | 0.889630129,   | 0.5385950523  |
| C, | 6.826199124,   | 1.1867414259,  | 1.7716122473  |
| C, | 6.9426224936,  | 2.4438258578,  | 1.1775002186  |
| C, | 6.0630393236,  | 1.069681808,   | 2.9315528987  |
| C, | 6.2928389839,  | 3.5451978434,  | 1.7118717902  |
| H, | 7.5455007916,  | 2.5578238751,  | 0.2970103085  |
| C, | 5.4199955684,  | 2.1731931538,  | 3.473284961   |
| H, | 5.9701953549,  | 0.113460919,   | 3.4075667105  |

|    |                |                |               |
|----|----------------|----------------|---------------|
| C, | 5.5283374418,  | 3.4135649885,  | 2.8629764734  |
| H, | 6.3866736274,  | 4.5020426163,  | 1.2348594135  |
| H, | 4.8376828098,  | 2.0625838286,  | 4.3679308878  |
| H, | 5.0289674619,  | 4.2667794644,  | 3.2803086001  |
| C, | 7.6873970962,  | -2.3840004993, | 0.4762293634  |
| C, | 7.3769470182,  | -3.0387996873, | -0.7160680026 |
| C, | 8.6671765059,  | -2.9348717776, | 1.2995947046  |
| C, | 8.0450183904,  | -4.1951563726, | -1.0865665033 |
| H, | 6.6091049666,  | -2.641637781,  | -1.3520454052 |
| C, | 9.330109428,   | -4.0977618151, | 0.9348119638  |
| H, | 8.9128903667,  | -2.4505011692, | 2.2239754874  |
| C, | 9.0250087664,  | -4.7293798717, | -0.2612881837 |
| H, | 7.7985806878,  | -4.6792025286, | -2.0122391194 |
| H, | 10.0808171519, | -4.5069429792, | 1.5834575426  |
| H, | 9.5390522094,  | -5.6277050748, | -0.5446989759 |

Version=IA32W-G09RevC.01|State=1-A|HF=-1683.1351459|RMSD=8.998e  
-009|RMSF=3.684e-006|Dipole=0.1079536,0.0376573,-0.0136987|Quadrupole=  
6.3459438,-11.3841321,5.0381883,0.1540777,-1.0362373,0.7996994|PG=C01  
[X(C44H30)]

For Compound 8/9:

FOpt[RHF|6-31G|C128H90|PROF. GHORAI|23-Nov-2014

|    | x              | y              | z             |
|----|----------------|----------------|---------------|
| C, | 0.3766651327,  | -3.627646068,  | 0.4609951251  |
| C, | -0.8824898107, | -3.0452739545, | 0.4782095061  |
| C, | -0.9827067989, | -1.6462607768, | 0.3640112209  |
| C, | 0.1969041076,  | -0.8729169,    | 0.1999367148  |
| C, | 1.4668958766,  | -1.5062739418, | 0.1522530534  |
| C, | 1.546388782,   | -2.9049660995, | 0.2689418603  |
| C, | -2.2413265667, | -0.9541497128, | 0.4627912874  |
| C, | 0.1044131732,  | 0.5634342233,  | 0.0803942327  |
| C, | -1.1642104982, | 1.1920598789,  | 0.0947187364  |
| C, | -2.3272108909, | 0.3788979352,  | 0.3295519665  |
| C, | -1.2570777212, | 2.5851367248,  | -0.080445926  |
| C, | -0.0883416916, | 3.3186674315,  | -0.2119155019 |
| C, | 1.1763232638,  | 2.7435762473,  | -0.1562315301 |
| C, | 1.2835690726,  | 1.3466166988,  | -0.0457283297 |
| C, | 2.5494043766,  | 0.6607944724,  | -0.0829013531 |
| C, | 2.6351801151,  | -0.6748677337, | 0.0143322742  |
| H, | 3.5966185902,  | -1.141242161,  | -0.0007392336 |
| H, | 3.4416923108,  | 1.2369579389,  | -0.2013972026 |
| H, | -3.1224468491, | -1.5213246684, | 0.6737570038  |
| H, | 0.4468639094,  | -4.6954352006, | 0.5568115968  |
| H, | -3.2795436604, | 0.8559778169,  | 0.4379531734  |
| H, | -0.1604443595, | 4.3781436213,  | -0.3657957767 |
| C, | 2.8064470117,  | -3.6847704446, | 0.1951721834  |
| C, | 3.7207813325,  | -3.6111758663, | -0.7696126429 |
| H, | 2.9207766558,  | -4.4233197276, | 0.9698061223  |
| H, | 3.5595296694,  | -2.9281543041, | -1.5851296969 |
| C, | 4.9481083909,  | -4.4222958287, | -0.8703071071 |
| C, | 5.5753440028,  | -4.5566827727, | -2.1093097261 |

|    |                |                 |               |
|----|----------------|-----------------|---------------|
| C, | 5.5307467921,  | -5.0609924835,  | 0.2247640971  |
| C, | 6.7229729667,  | -5.3162894231,  | -2.2540425379 |
| H, | 5.1585020767,  | -4.0638635812,  | -2.9677865843 |
| C, | 6.6720457945,  | -5.8296515482,  | 0.077712598   |
| H, | 5.1053673095,  | -4.9447319767,  | 1.2023928526  |
| C, | 7.2839740286,  | -5.9821571657,  | -1.1655915586 |
| H, | 7.1882877724,  | -5.3912328609,  | -3.2179824011 |
| H, | 7.0963085506,  | -6.3109030965,  | 0.9365638943  |
| C, | 8.5405157554,  | -6.7830896108,  | -1.3279260272 |
| C, | 8.6529035031,  | -8.0595017047,  | -0.9187931503 |
| C, | 9.9558234815,  | -8.8031632797,  | -0.9128120944 |
| C, | 10.0618444159, | -10.0406807912, | -1.5485658903 |
| C, | 11.0691780202, | -8.3070968428,  | -0.237678318  |
| C, | 11.2534811506, | -10.7480522797, | -1.532507291  |
| H, | 9.2078871367,  | -10.4494847045, | -2.0538696061 |
| C, | 12.2599059205, | -9.018681543,   | -0.2122593522 |
| H, | 11.0039170761, | -7.3622157151,  | 0.2646704288  |
| C, | 12.3579840406, | -10.2389746372, | -0.8633243213 |
| H, | 11.3180438525, | -11.6939060326, | -2.0356078557 |
| H, | 13.1056680948, | -8.6200519755,  | 0.3145507225  |
| H, | 13.2795068036, | -10.7885765737, | -0.8457011127 |
| C, | 7.4860805197,  | -8.865930233,   | -0.4299391435 |
| C, | 7.5443271709,  | -9.508887678,   | 0.8070440786  |
| C, | 6.3446205649,  | -9.0337240887,  | -1.2113136958 |
| C, | 6.4817521387,  | -10.2742613401, | 1.2607777888  |
| H, | 8.4251126694,  | -9.4104311197,  | 1.4122166754  |
| C, | 5.2840828123,  | -9.8076504103,  | -0.7628335878 |
| H, | 6.2857930659,  | -8.5553580759,  | -2.1690183161 |
| C, | 5.3466100031,  | -10.4265671532, | 0.476429685   |
| H, | 6.5416767789,  | -10.7533521197, | 2.219324158   |
| H, | 4.4143330586,  | -9.9256411308,  | -1.3803619848 |
| H, | 4.5256956791,  | -11.0236980658, | 0.8244617432  |



|    |                 |                 |               |
|----|-----------------|-----------------|---------------|
| C, | 9.6619583206,   | -6.0365470616,  | -1.9885413616 |
| C, | 10.074855752,   | -4.8010570233,  | -1.4886745625 |
| C, | 10.2814088964,  | -6.528312955,   | -3.135589315  |
| C, | 11.0949471578,  | -4.0912754366,  | -2.1020934699 |
| H, | 9.593633268,    | -4.395780948,   | -0.6192064422 |
| C, | 11.2961005267,  | -5.8143795412,  | -3.7565858032 |
| H, | 9.9712116069,   | -7.4717839527,  | -3.5394503922 |
| C, | 11.7097352884,  | -4.5960370528,  | -3.2397190207 |
| H, | 11.4050026826,  | -3.1470132045,  | -1.6969396119 |
| H, | 11.7597256683,  | -6.209667516,   | -4.6400629926 |
| H, | 12.4959892515,  | -4.044618509,   | -3.7185850887 |
| C, | -2.0394489725,  | -3.963076923,   | 0.6090653246  |
| C, | -3.1258965348,  | -3.9758270628,  | -0.1607357775 |
| H, | -1.9198568291,  | -4.7263195356,  | 1.3583533471  |
| H, | -3.2013709241,  | -3.2614356093,  | -0.9615118077 |
| C, | -4.2539143449,  | -4.9203480476,  | -0.0636899975 |
| C, | -5.0954767376,  | -5.0885013887,  | -1.1638638039 |
| C, | -4.5295307185,  | -5.6648138761,  | 1.0836848006  |
| C, | -6.1541282324,  | -5.9789485784,  | -1.1284067748 |
| H, | -4.9112217357,  | -4.5252976171,  | -2.0596961506 |
| C, | -5.5940424647,  | -6.5482566178,  | 1.122194809   |
| H, | -3.9233328862,  | -5.5448984751,  | 1.9602065311  |
| C, | -6.4306540855,  | -6.7186207009,  | 0.0201459653  |
| H, | -6.7695534525,  | -6.1023391966,  | -1.9986983762 |
| H, | -5.7847754533,  | -7.1028217095,  | 2.0195229462  |
| C, | -7.5667229161,  | -7.6963586911,  | 0.0406261722  |
| C, | -8.5205863526,  | -7.6930503314,  | 0.9890031946  |
| C, | -9.5492160412,  | -8.777719275,   | 1.1160219297  |
| C, | -10.9068801355, | -8.4581104795,  | 1.1543372544  |
| C, | -9.1788545753,  | -10.1144911277, | 1.2476847479  |
| C, | -11.8664336445, | -9.4484101337,  | 1.2929015937  |
| H, | -11.209938107,  | -7.431462049,   | 1.0778719312  |

|    |                 |                 |               |
|----|-----------------|-----------------|---------------|
| C, | -10.1377822458, | -11.1060234879, | 1.3964458221  |
| H, | -8.1398807575,  | -10.3783640663, | 1.2300122222  |
| C, | -11.484754656,  | -10.7774504388, | 1.4147590035  |
| H, | -12.9063450434, | -9.1834847847,  | 1.3105532404  |
| H, | -9.831934695,   | -12.1297087628, | 1.4977713612  |
| H, | -12.2268005495, | -11.5443908321, | 1.5276155388  |
| C, | -7.5465941115,  | -8.6798408702,  | -1.0924756541 |
| C, | -6.4049126878,  | -9.4421429705,  | -1.341923452  |
| C, | -8.6379033549,  | -8.820954518,   | -1.9471329335 |
| C, | -6.3655920193,  | -10.3381961985, | -2.3984314872 |
| H, | -5.5463063563,  | -9.3300492141,  | -0.7078920393 |
| C, | -8.5966168602,  | -9.7104429317,  | -3.0110848092 |
| H, | -9.5206517757,  | -8.2369240513,  | -1.7764789876 |
| C, | -7.4626269399,  | -10.4754788922, | -3.2378185386 |
| H, | -5.4815546061,  | -10.922536529,  | -2.5684789685 |
| H, | -9.447197214,   | -9.8035497832,  | -3.6588304563 |
| H, | -7.4311216162,  | -11.1650303145, | -4.0594495968 |
| C, | -8.65103803,    | -6.6037861848,  | 2.0123249973  |
| C, | -8.6981008645,  | -6.9171894873,  | 3.3711792953  |
| C, | -8.7771515727,  | -5.2683462616,  | 1.6351934057  |
| C, | -8.8391509367,  | -5.9221466249,  | 4.3254922722  |
| H, | -8.6265125555,  | -7.942729547,   | 3.6791494939  |
| C, | -8.9283506483,  | -4.2721081912,  | 2.5888438351  |
| H, | -8.753388516,   | -5.0094871327,  | 0.5950175085  |
| C, | -8.9548993104,  | -4.594472771,   | 3.9371863218  |
| H, | -8.8634089845,  | -6.1822728457,  | 5.3664638133  |
| H, | -9.0251019302,  | -3.2495029956,  | 2.2779149343  |
| H, | -9.0693497189,  | -3.8238935972,  | 4.6751809376  |
| C, | 2.3302762354,   | 3.6709471167,   | -0.2412939779 |
| C, | 3.3755484044,   | 3.7041947075,   | 0.5829243212  |
| H, | 2.2426655438,   | 4.4239763137,   | -1.0053682905 |
| H, | 3.4165931246,   | 3.0015390267,   | 1.3965994651  |

|    |                |                |               |
|----|----------------|----------------|---------------|
| C, | 4.4970375055,  | 4.6599410444,  | 0.5290328604  |
| C, | 5.2763672276,  | 4.8596940578,  | 1.6690160214  |
| C, | 4.8333439633,  | 5.3759030067,  | -0.6203534623 |
| C, | 6.3324214409,  | 5.7539773536,  | 1.6689310191  |
| H, | 5.0511509956,  | 4.3112134642,  | 2.5646112654  |
| C, | 5.8823473208,  | 6.2784382501,  | -0.6169472748 |
| H, | 4.2880789407,  | 5.2170635524,  | -1.5301047634 |
| C, | 6.6450721079,  | 6.4940745473,  | 0.5299234064  |
| H, | 6.9199826002,  | .8769815034,   | 2.5583049238  |
| H, | 6.1161732211,  | 6.8163255761,  | -1.514293239  |
| C, | 7.805660711,   | 7.4426163101,  | 0.532741805   |
| C, | 7.7025570291,  | 8.7266608352,  | 0.1456033078  |
| C, | 8.8913250112,  | 9.6254923339,  | -0.0264535544 |
| C, | 8.937771627,   | 10.861156274,  | 0.6199660834  |
| C, | 9.9470403543,  | 9.2764782034,  | -0.8661617791 |
| C, | 10.020167307,  | 11.7103409877, | 0.4528250429  |
| H, | 8.1227748661,  | 11.1570887777, | 1.2523414456  |
| C, | 11.0266834186, | 10.1298072596, | -1.0423225115 |
| H, | 9.9245195659,  | 8.3351206836,  | -1.37875429   |
| C, | 11.0696231484, | 11.3472598586, | -0.3800655019 |
| H, | 10.0419492789, | 12.6526059763, | 0.9662302353  |
| H, | 11.8292586435, | 9.8431664102,  | -1.6945976862 |
| H, | 11.9055957327, | 12.0065636469, | -0.514416508  |
| C, | 6.3884325693,  | 9.3870834065,  | -0.1505162342 |
| C, | 6.1885935895,  | 10.0423445661, | -1.366074813  |
| C, | 5.3604761743,  | 9.4064231932,  | 0.7899902053  |
| C, | 4.9867684936,  | 10.6743442535, | -1.6434510468 |
| H, | 6.9777098527,  | 10.0581769107, | -2.0932362983 |
| C, | 4.1604191209,  | 10.047182048,  | 0.5177549288  |
| H, | 5.4994066499,  | 8.9166211302,  | 1.7335498037  |
| C, | 3.9672882839,  | 10.6790368805, | -0.7013424089 |
| H, | 4.8486532615,  | 11.164762508,  | -2.5880843747 |

|    |                 |                |               |
|----|-----------------|----------------|---------------|
| H, | 3.3814983546,   | 10.0519934562, | 1.2559895805  |
| H, | 3.0383665829,   | 11.1728371734, | -0.9130734713 |
| C, | 9.092870518,    | 6.8346004908,  | 1.0068743462  |
| C, | 9.5754765894,   | 5.6639071353,  | 0.4208990105  |
| C, | 9.8077389351,   | 7.3891957039,  | 2.0664300788  |
| C, | 10.7519090571,  | 5.0803023334,  | 0.863694501   |
| H, | 9.0260491193,   | 5.2098084539,  | -0.3814207418 |
| C, | 10.9804673963,  | 6.8007355531,  | 2.5173949381  |
| H, | 9.4474329233,   | 8.2836303752,  | 2.5350777322  |
| C, | 11.4592645022,  | 5.647311338,   | 1.9149313991  |
| H, | 11.1119998425,  | 4.1850986005,  | 0.3937287012  |
| H, | 11.5158277311,  | 7.2426548549,  | 3.3358305059  |
| H, | 12.3674393958,  | 5.1931347686,  | 2.2620921573  |
| C, | -2.5665835632,  | 3.2675935146,  | -0.1435797572 |
| C, | -2.8289645735,  | 4.4570599723,  | 0.3968292745  |
| H, | -3.3457866025,  | 2.7492069201,  | -0.6709392822 |
| H, | -2.0654741927,  | 4.9375518072,  | 0.98363345    |
| C, | -4.1031001759,  | 5.192496867,   | 0.3131458782  |
| C, | -4.3750746072,  | 6.1924377343,  | 1.2476803032  |
| C, | -5.0605685574,  | 4.9484764586,  | -0.67224273   |
| C, | -5.5618082537,  | 6.9032772873,  | 1.2141146363  |
| H, | -3.6508098736,  | 6.4130305542,  | 2.0095340481  |
| C, | -6.2523274709,  | 5.6512591103,  | -0.6986424966 |
| H, | -4.8703251744,  | 4.2205619661,  | -1.4365455625 |
| C, | -6.5316616705,  | 6.6341050226,  | 0.249836496   |
| H, | -5.7362212293,  | 7.6740885298,  | 1.9399134035  |
| H, | -6.9702685731,  | 5.440530208,   | -1.466377074  |
| C, | -7.8035793243,  | 7.4259443782,  | 0.207205082   |
| C, | -9.0211154642,  | 6.8547641353,  | 0.1822899571  |
| C, | -10.2835953029, | 7.6331302217,  | -0.0434863095 |
| C, | -11.3453654421, | 7.5267180629,  | 0.8555135357  |
| C, | -10.4470248868, | 8.4360546293,  | -1.170451214  |

|    |                 |                |               |
|----|-----------------|----------------|---------------|
| C, | -12.5250633921, | 8.2236627466,  | 0.6476434389  |
| H, | -11.2462452293, | 6.8946818787,  | 1.717144363   |
| C, | -11.6310450837, | 9.1266002937,  | -1.3851142183 |
| H, | -9.645607454,   | 8.5227385859,  | -1.8772963904 |
| C, | -12.6722656083, | 9.026894941,   | -0.4748740663 |
| H, | -13.3269264121, | 8.1363642687,  | 1.3556779422  |
| H, | -11.7376764745, | 9.7387506155,  | -2.2601272313 |
| H, | -13.5873966683, | 9.5626242527,  | -0.6395067506 |
| C, | -9.2368152197,  | 5.3832952708,  | 0.3797431996  |
| C, | -9.9683576921,  | 4.6481444361,  | -0.5536955893 |
| C, | -8.7602423716,  | 4.7280574887,  | 1.5134060022  |
| C, | -10.1931113729, | 3.2926807731,  | -0.3722398047 |
| H, | -10.3634859253, | 5.1409725812,  | -1.4212701198 |
| C, | -8.9928125647,  | 3.3732957421,  | 1.7014123473  |
| H, | -8.2044167799,  | 5.2786355027,  | 2.2464813014  |
| C, | -9.7056320221,  | 2.6498296435,  | 0.7573666909  |
| H, | -10.7501811813, | 2.7423781135,  | -1.1062450041 |
| H, | -8.6185170254,  | 2.8874844398,  | 2.5821174667  |
| H, | -9.8842200283,  | 1.6015301967,  | 0.9015106312  |
| C, | -7.5998172339,  | 8.9124748475,  | 0.1961831434  |
| C, | -6.7676365307,  | 9.501138808,   | -0.7565747775 |
| C, | -8.1905821391,  | 9.7307119475,  | 1.1567797115  |
| C, | -6.5541301877,  | 10.8704503552, | -0.7647131304 |
| H, | -6.2858991746,  | 8.8836998238,  | -1.4903968509 |
| C, | -7.9700015465,  | 11.1004923314, | 1.1560422726  |
| H, | -8.8259865198,  | 9.2949997619,  | 1.90235568    |
| C, | -7.1551842781,  | 11.6758510594, | 0.1929022054  |
| H, | -5.9183223364,  | 11.3058371484, | -1.5117831614 |
| H, | -8.4332450611,  | 11.7134404569, | 1.9053335144  |
| H, | -6.9862224657,  | 12.7355784221, | 0.1906728802  |

||Version=IA32W-G09RevC.01|State=1-A|HF=-4897.8653323|RMSD=9.179e-009| RMSF=5.517e-007|Dipole=0.0003331,-0.086473,-0.0163578 |Quadrupole=9.1297911,5.3788442,-14.5086353,-0.0920476,0.6976953,0.0210477|PG=C01 [X(C128H90)]||

**For Compound 10:**

**FOpt[RHF|6-31G|C152H106|PROF. GHORAI**

|    | <b>x</b>        | <b>y</b>        | <b>z</b>       |
|----|-----------------|-----------------|----------------|
| C, | -18.2098186436, | -30.6642340701, | -25.0915647649 |
| C, | -17.6431138543, | -30.3574151342, | -23.8629189506 |
| C, | -18.0564018012, | -29.1868469024, | -23.2002013278 |
| C, | -19.0614760062, | -28.3715792056, | -23.7846314528 |
| C, | -19.6440760269, | -28.7346205559, | -25.0276150457 |
| C, | -19.2173603851, | -29.9075618492, | -25.6744164571 |
| C, | -17.456573611,  | -28.7479281148, | -21.9671243961 |
| C, | -19.4931738326, | -27.1687539872, | -23.1117907167 |
| C, | -18.9359447139, | -26.8241291506, | -21.8566404192 |
| C, | -17.8745101472, | -27.6412244542, | -21.3326105521 |
| C, | -19.3987486442, | -25.6836399592, | -21.1747366856 |
| C, | -20.3611389494, | -24.8910201765, | -21.7803745036 |
| C, | -20.8762523924, | -25.1587713743, | -23.0437797635 |
| C, | -20.4710137392, | -26.3283245241, | -23.7094096382 |
| C, | -21.0290449608, | -26.7340400165, | -24.9735917527 |
| C, | -20.6383342689, | -27.8586596192, | -25.5927683557 |
| H, | -21.0668073818, | -28.1127964517, | -26.5382561699 |
| H, | -21.7826751416, | -26.1228472647, | -25.421583593  |
| H, | -16.6401082523, | -29.3094857146, | -21.566390705  |
| H, | -17.8843286247, | -31.5552870846, | -25.5959066848 |
| H, | -17.3814158594, | -27.3354566255, | -20.4328143816 |
| H, | -20.7281039555, | -24.0326697071, | -21.251263445  |
| C, | -16.6368540684, | -31.3102959139, | -23.3360388518 |
| C, | -16.6204383454, | -31.8434202185, | -22.1159695735 |
| H, | -15.9111336693, | -31.6382082599, | -24.0600886001 |
| H, | -17.398266411,  | -31.5751356496, | -21.4229219763 |
| C, | -19.7752231845, | -30.4125584204, | -26.9531888811 |
| C, | -21.0634111828, | -30.6117389294, | -27.2233492745 |

|    |                 |                 |                |
|----|-----------------|-----------------|----------------|
| H, | -19.0356622351, | -30.7061124757, | -27.6780950207 |
| H, | -21.7916197702, | -30.3915815939, | -26.4625318806 |
| C, | -21.8470751524, | -24.1774665168, | -23.5855574006 |
| C, | -21.8030528645, | -23.6106183278, | -24.7895745091 |
| H, | -22.5991216886, | -23.8597430382, | -22.8841077069 |
| H, | -20.9998962798, | -23.8723535294, | -25.4558354347 |
| C, | -18.8933037848, | -25.3322536134, | -19.8309847609 |
| C, | -18.6449538173, | -24.091036385,  | -19.4146866367 |
| H, | -18.7253726513, | -26.1535641149, | -19.1592137703 |
| H, | -18.7484683864, | -23.2811460007, | -20.1157454055 |
| C, | -15.6477457595, | -32.8281574196, | -21.6081295514 |
| C, | -15.9852734193, | -33.6125817839, | -20.5056660939 |
| C, | -14.3859414966, | -33.0151679508, | -22.1750232092 |
| C, | -15.1112987858, | -34.5613665973, | -20.0031182352 |
| H, | -16.9482525772, | -33.4893699749, | -20.046192572  |
| C, | -13.5120444526, | -33.962515956,  | -21.6730389618 |
| H, | -14.0711682584, | -32.4010810133, | -22.9960929226 |
| C, | -13.8573740282, | -34.757466165,  | -20.5789600565 |
| H, | -15.4138231538, | -35.1668932376, | -19.1706858749 |
| H, | -12.5399946915, | -34.0663706123, | -22.1153110508 |
| C, | -21.6185829913, | -31.160101702,  | -28.4745213096 |
| C, | -22.9010527855, | -31.7076903758, | -28.467339814  |
| C, | -20.9228325578, | -31.1543002678, | -29.6844710059 |
| C, | -23.4592448837, | -32.2476780253, | -29.6133495604 |
| H, | -23.4678652401, | -31.7104489132, | -27.5550295812 |
| C, | -21.4793032324, | -31.6951365781, | -30.8295182612 |
| H, | -19.9453253227, | -30.7162746675, | -29.7387374062 |
| C, | -22.7576065313, | -32.2551679121, | -30.817549811  |
| H, | -24.4546499656, | -32.6463460238, | -29.5764627395 |
| H, | -20.9117829325, | -31.693230108,  | -31.74012228   |
| C, | -22.7376823904, | -22.5969888308, | -25.3121129919 |
| C, | -22.3439139131, | -21.7972889676, | -26.3846160895 |

|    |                 |                  |                |
|----|-----------------|------------------|----------------|
| C, | -24.0160252425, | -22.3959633474,  | -24.7888816553 |
| C, | -23.1804453085, | -20.8223836686,  | -26.9006483077 |
| H, | -21.3725675224, | -21.9405706932,  | -26.8200285521 |
| C, | -24.8516581877, | -21.4208648453,  | -25.3028219773 |
| H, | -24.3679804584, | -23.00943 94151, | -23.9826152591 |
| C, | -24.4508560159, | -20.6122538449,  | -26.3674369916 |
| H, | -22.8520095628, | -20.2357959253,  | -27.7368333734 |
| H, | -25.8212634207, | -21.2774622015,  | -24.8662544509 |
| C, | -18.1898222728, | -23.6935207024,  | -18.0707665799 |
| C, | -17.5794902342, | -22.4513886607,  | -17.8981023984 |
| C, | -18.3445363003, | -24.5014048718,  | -16.9428698507 |
| C, | -17.1226507166, | -22.0398292089,  | -16.6578566288 |
| H, | -17.4615918732, | -21.8002598973,  | -18.7441224245 |
| C, | -17.8864120398, | -24.0918089085,  | -15.7037257187 |
| H, | -18.8349362286, | -25.4515290637,  | -17.0270989574 |
| C, | -17.26398144,   | -22.8539844051,  | -15.5354865149 |
| H, | -16.6724777055, | -21.0710882944,  | -16.557632731  |
| H, | -18.0026552798, | -24.743829381,   | -14.8595319798 |
| C, | -12.9138185343, | -35.7722351798,  | -20.0418188155 |
| C, | -12.1842237372, | -36.5979013346,  | -20.8950927231 |
| C, | -12.7341515559, | -35.9332626481,  | -18.6678655669 |
| C, | -11.300495576,  | -37.540565871,   | -20.3955229091 |
| H, | -12.3223713334, | -36.5192834376,  | -21.9562511922 |
| C, | -11.8595876206, | -36.8831542245,  | -18.1694687758 |
| H, | -13.2684331433, | -35.3011259316,  | -17.9849553188 |
| C, | -11.1150948153, | -37.6952659021,  | -19.0240958053 |
| H, | -10.7543748132, | -38.1631832505,  | -21.0762169142 |
| H, | -11.748971168,  | -36.9915023863,  | -17.1075860117 |
| C, | -23.3529259507, | -32.8324634283,  | -32.0508554672 |
| C, | -23.2319881283, | -32.1861006913,  | -33.2795530428 |
| C, | -24.0559044532, | -34.0368414064,  | -32.0143198308 |
| C, | -23.7820691209, | -32.7277962416,  | -34.4298447649 |



|    |                 |                 |                |
|----|-----------------|-----------------|----------------|
| H, | -22.7235461317, | -31.242903099,  | -33.3356965243 |
| C, | -24.6149645939, | -34.5714216197, | -33.1620268266 |
| H, | -24.1520368933, | -34.5672305838, | -31.0864799401 |
| C, | -24.4763443365, | -33.9343818863, | -34.3945603738 |
| H, | -23.6747423285, | -32.206838566,  | -35.3606198951 |
| H, | -25.1589190087, | -35.4945141783, | -33.1021501559 |
| C, | -25.3531521124, | -19.5678336111, | -26.9185559888 |
| C, | -26.708377497,  | -19.8211764142, | -27.1218372652 |
| C, | -24.8689695623, | -18.3033544858, | -27.2542959302 |
| C, | -27.550100719,  | -18.8452076425, | -27.6299439923 |
| H, | -27.1056765582, | -20.7933945221, | -26.9022376494 |
| C, | -25.7084070073, | -17.3326817515, | -27.7726552331 |
| H, | -23.8335685695, | -18.0717917883, | -27.0937742187 |
| C, | -27.0681558072, | -17.5803082156, | -27.9568626366 |
| H, | -28.5879289134, | -19.0697226108, | -27.7774730042 |
| H, | -25.3061441416, | -16.3719966193, | -28.0312067796 |
| C, | -16.7760191724, | -22.4164993764, | -14.2016537974 |
| C, | -17.5399044243, | -22.6182081893, | -13.053628258  |
| C, | -15.5400652904, | -21.7853780137, | -14.0595181479 |
| C, | -17.0817487187, | -22.215597264,  | -11.8097693715 |
| H, | -18.5082880664, | -23.0733656626, | -13.1332961801 |
| C, | -15.0883033727, | -21.3731494342, | -12.8179360314 |
| H, | -14.9208675145, | -21.6308080721, | -14.9221504186 |
| C, | -15.844150131,  | -21.593411044,  | -11.667129764  |
| H, | -17.6923263886, | -22.382263722,  | -10.9445032581 |
| H, | -14.1377405042, | -20.8812643928, | -12.7400977069 |
| C, | -10.1871065078, | -38.7340770678, | -18.4697102218 |
| C, | -8.8947656757,  | -38.8283782388, | -18.8300366528 |
| C, | -25.1051838223, | -34.5144034643, | -35.6257201182 |
| C, | -24.4191885083, | -34.7434872078, | -36.7596484742 |
| C, | -27.96141502,   | -16.5262331468, | -28.5387767898 |
| C, | -29.1039870703, | -16.1287620951, | -27.9510489141 |

|    |                 |                 |                |
|----|-----------------|-----------------|----------------|
| C, | -15.3514531524, | -21.1228268633, | -10.3316855777 |
| C, | -15.2639661636, | -21.928414134,  | -9.2582511571  |
| C, | -26.5674607348, | -34.8176821449, | -35.4807896294 |
| C, | -27.0697243243, | -36.0934606736, | -35.7286952053 |
| C, | -27.4504873889, | -33.829884678,  | -35.0433489765 |
| C, | -28.418683111,  | -36.3708898404, | -35.5606178999 |
| H, | -26.4046659081, | -36.8677164708, | -36.0568503099 |
| C, | -28.7999216508, | -34.1027804557, | -34.8844388654 |
| H, | -27.0777197139, | -32.8473147336, | -34.825660348  |
| C, | -29.2892610203, | -35.3758905521, | -35.1426433427 |
| H, | -28.7857089911, | -37.3603536435, | -35.7555329184 |
| H, | -29.4650800941, | -33.3269784548, | -34.5563842029 |
| H, | -30.3330701132, | -35.5895866466, | -35.0147107103 |
| C, | -22.9270244548, | -34.6164540494, | -36.8509389191 |
| C, | -22.0869525245, | -35.3269370324, | -35.995916459  |
| C, | -22.3482589615, | -33.8150202699, | -37.8355967765 |
| C, | -20.7078644525, | -35.2267997944, | -36.1098229227 |
| H, | -22.5135199941, | -35.9556268406, | -35.2394103155 |
| C, | -20.9709085485, | -33.7061202557, | -37.9443157899 |
| H, | -22.9793815988, | -33.2789657986, | -38.5182702201 |
| C, | -20.1449064061, | -34.4125930796, | -37.0808595224 |
| H, | -20.0780593493, | -35.7836786592, | -35.4427336598 |
| H, | -20.5447069202, | -33.07713676,   | -38.7023761822 |
| H, | -19.0782614554, | -34.3335274731, | -37.1681552836 |
| C, | -27.4675902306, | -15.9530831138, | -29.8344930358 |
| C, | -27.2718065165, | -14.5825356156, | -29.9913602121 |
| C, | -27.1459526135, | -16.7958669671, | -30.8989663081 |
| C, | -26.7843598545, | -14.0663944118, | -31.1833769256 |
| H, | -27.5048573986, | -13.9201692858, | -29.1811636765 |
| C, | -26.6682786439, | -16.2810348822, | -32.0937355536 |
| H, | -27.2687505396, | -17.8562928577, | -30.7884968133 |
| C, | -26.4853992039, | -14.9128089544, | -32.2401819065 |

|    |                 |                 |                |
|----|-----------------|-----------------|----------------|
| H, | -26.6393020355, | -13.0078073822, | -31.2838448054 |
| H, | -26.4357239917, | -16.9447830019, | -32.9044666146 |
| H, | -26.1104951138, | -14.5136832117, | -33.1630685125 |
| C, | -29.50646505,   | -16.5620342671, | -26.5721689024 |
| C, | -28.6700057869, | -16.3574558042, | -25.4766985658 |
| C, | -30.7582873474, | -17.1380726465, | -26.3532313797 |
| C, | -29.0653475776, | -16.7330693461, | -24.2009634608 |
| H, | -27.7082541421, | -15.9070925124, | -25.6240736612 |
| C, | -31.1507003847, | -17.5229523871, | -25.080967043  |
| H, | -31.4254436777, | -17.2816771976, | -27.1814802917 |
| C, | -30.3046356146, | -17.3214349097, | -23.9990700036 |
| H, | -28.4071984132, | -16.5652676473, | -23.3700285712 |
| H, | -32.113904595,  | -17.9730858638, | -24.9342014055 |
| H, | -30.6100390241, | -17.6137394599, | -23.0127221456 |
| C, | -8.2060812097,  | -37.798853162,  | -19.6766897389 |
| C, | -7.5278386053,  | -38.1800303129, | -20.8349227116 |
| C, | -8.1831486601,  | -36.4557051571, | -19.3065589506 |
| C, | -6.8695227736,  | -37.2418705999, | -21.614187509  |
| H, | -7.5146260112,  | -39.2137647841, | -21.1229071837 |
| C, | -7.5161980829,  | -35.5168155797, | -20.0802220004 |
| H, | -8.6903740812,  | -36.145567175,  | -18.4143388714 |
| C, | -6.8612874011,  | -35.9054039204, | -21.2390408142 |
| H, | -6.3612963692,  | -37.5532935712, | -22.506736579  |
| H, | -7.5087409342,  | -34.4873843253, | -19.7769335675 |
| H, | -6.3467741199,  | -35.1792079036, | -21.8386307647 |
| C, | -10.8273375305, | -39.6586833339, | -17.476513243  |
| C, | -10.3044645329, | -39.8179824263, | -16.194883015  |
| C, | -11.9970935325, | -40.344061678,  | -17.806313277  |
| C, | -10.9228407908, | -40.651189823,  | -15.2738605308 |
| H, | -9.411234521,   | -39.2923754234, | -15.9204032722 |
| C, | -12.6105361381, | -41.1843678657, | -16.8907378006 |
| H, | -12.4269587112, | -40.2160508545, | -18.7813097627 |

|    |                 |                 |                |
|----|-----------------|-----------------|----------------|
| C, | -12.0749673804, | -41.340869116,  | -15.6196737276 |
| H, | -10.505051877,  | -40.7594648045, | -14.2912775537 |
| H, | -13.5043538421, | -41.7106246783, | -17.1665387691 |
| H, | -12.5522015765, | -41.9871805612, | -14.9082673853 |
| C, | -15.4731285337, | -23.412279798,  | -9.3319228901  |
| C, | -14.7284707235, | -24.205376577,  | -10.2025853446 |
| C, | -16.3910500986, | -24.0360578516, | -8.4862650153  |
| C, | -14.907428214,  | -25.5806816329, | -10.2399262611 |
| H, | -14.0112812255, | -23.7448763153, | -10.853036941  |
| C, | -16.5781395865, | -25.4086170602, | -8.5293274521  |
| H, | -16.9565486629, | -23.4440226459, | -7.7924190256  |
| C, | -15.8359911112, | -26.1866721215, | -9.4072705471  |
| H, | -14.3226672884, | -26.1741460395, | -10.9164073022 |
| H, | -17.2957793589, | -25.8688932627, | -7.8773569617  |
| H, | -15.9759522618, | -27.2502142642, | -9.4371168988  |
| C, | -14.9635808213, | -19.6737929623, | -10.2987095018 |
| C, | -13.693386037,  | -19.274018999,  | -9.8886845248  |
| C, | -15.8607814589, | -18.6957398597, | -10.7291538324 |
| C, | -13.334701968,  | -17.9337830605, | -9.8925059806  |
| H, | -12.987410609,  | -20.0122949874, | -9.5631027512  |
| C, | -15.5074495387, | -17.355653394,  | -10.7242412202 |
| H, | -16.835832914,  | -18.9870581901, | -11.0700245992 |
| C, | -14.2415142038, | -16.969574412,  | -10.3055772902 |
| H, | -12.3509291123, | -17.6463728361, | -9.5741892363  |
| H, | -16.2149695761, | -16.6171934391, | -11.0498496729 |
| H, | -13.9651387996, | -15.9326617681, | -10.3065162717 |
| C, | -30.0881453122, | -15.2119642023, | -28.6156387549 |
| C, | -30.5173752831, | -14.0529168301, | -27.9681612034 |
| C, | -30.6317754355, | -15.5150235393, | -29.8622582304 |
| C, | -31.4421653005, | -13.2084090227, | -28.5616360996 |
| H, | -30.1271368492, | -13.8153099147, | -26.9971013074 |
| C, | -31.5650907438, | -14.6757388606, | -30.453326447  |

|    |                 |                 |                |
|----|-----------------|-----------------|----------------|
| H, | -30.3211435799, | -16.4062510707, | -30.3708253773 |
| C, | -31.9700252393, | -13.5173408283, | -29.8077556394 |
| H, | -31.7527158221, | -12.3164397137, | -28.0518625162 |
| H, | -31.9730048023, | -14.9276513868, | -31.4134794964 |
| H, | -32.6902853731, | -12.8668503608, | -30.2656476237 |
| C, | -14.9473621543, | -21.4230780817, | -7.8816036878  |
| C, | -13.9022585632, | -21.9867629105, | -7.1488831821  |
| C, | -15.7111713101, | -20.4222133722, | -7.2846901044  |
| C, | -13.6127318507, | -21.5439342023, | -5.867976052   |
| H, | -13.3178073256, | -22.7749386058, | -7.58350283    |
| C, | -15.428860042,  | -19.9846924398, | -5.9987254407  |
| H, | -16.524234525,  | -19.9836652104, | -7.8287611401  |
| C, | -14.3760729339, | -20.54023536,   | -5.2876449413  |
| H, | -12.7986180963, | -21.9834470374, | -5.323947305   |
| H, | -16.0299644482, | -19.2136265596, | -5.5561444066  |
| H, | -14.1560901466, | -20.2005126796, | -4.2937771681  |
| C, | -8.0140004184,  | -39.9715373331, | -18.4199396659 |
| C, | -8.3665775296,  | -41.2913170866, | -18.6943659676 |
| C, | -6.7910510266,  | -39.7274179087, | -17.7941181268 |
| C, | -7.5293832463,  | -42.3389226883, | -18.3387545487 |
| H, | -9.2981503017,  | -41.4979033975, | -19.1831529068 |
| C, | -5.9582095062,  | -40.7733369319, | -17.4293289072 |
| H, | -6.492077607,   | -38.7159950366, | -17.595778704  |
| C, | -6.3248475508,  | -42.0843416316, | -17.7008631376 |
| H, | -7.8184629527,  | -43.3484404471, | -18.5602241288 |
| H, | -5.0257488601,  | -40.5657461934, | -16.9401073157 |
| H, | -5.6780791225,  | -42.8945615863, | -17.4237235522 |
| C, | -25.0780958367, | -35.1498974266, | -38.0447297877 |
| C, | -24.6455503985, | -36.2871943142, | -38.7276013218 |
| C, | -26.0952389205, | -34.3837474899, | -38.6103019931 |
| C, | -25.2312018426, | -36.6619105985, | -39.9264517711 |
| H, | -23.847322323,  | -36.8767033226, | -38.3189291223 |

C, -26.6757728716, -34.7520559436, -39.8153606619  
H, -26.4343858767, -33.5012086407, -38.1048080077  
C, -26.2494987906, -35.8946077529, -40.4752740442  
H, -24.8911178737, -37.5455062235, -40.4319418713  
H, -27.4569764919, -34.147704552, -40.2351528534  
H, -26.699834671, -36.1809489845, -41.4062851504

Version=IA32W-G09RevC.01|State=1-A|HF=-5815.7517918 |RMSD=7.868e-009|

RMSF=5.721e-007|Dipole=0.0057148,-0.0859635,-0.0348018|

Quadrupole=-6.293081,0.4229818,5.8700992,-6.0231133,9.5533654,-0.5134329|PG=C01 [X(C152H106)]

### 3. Copies of NMR and Mass spectroscopy

#### Compound 2a:

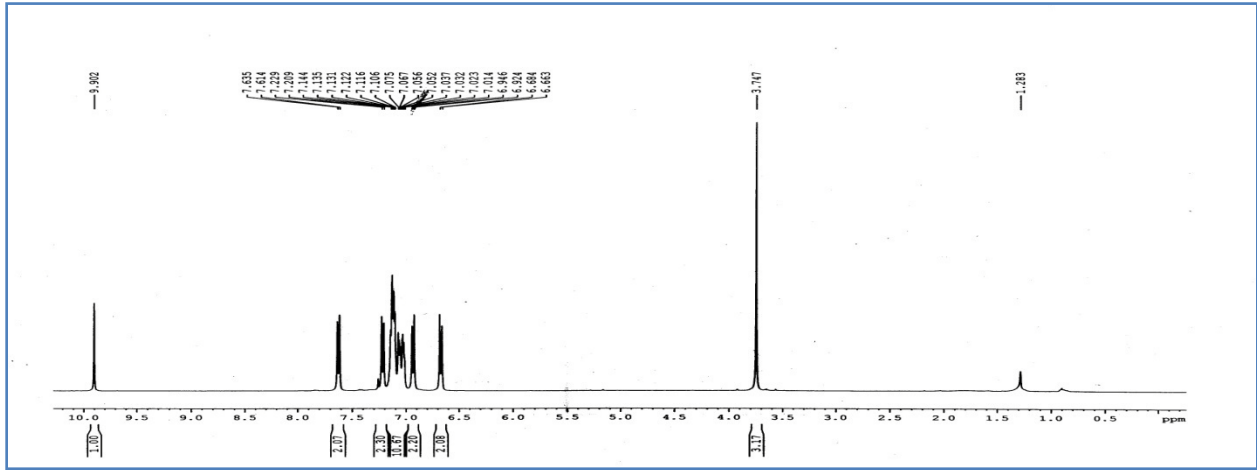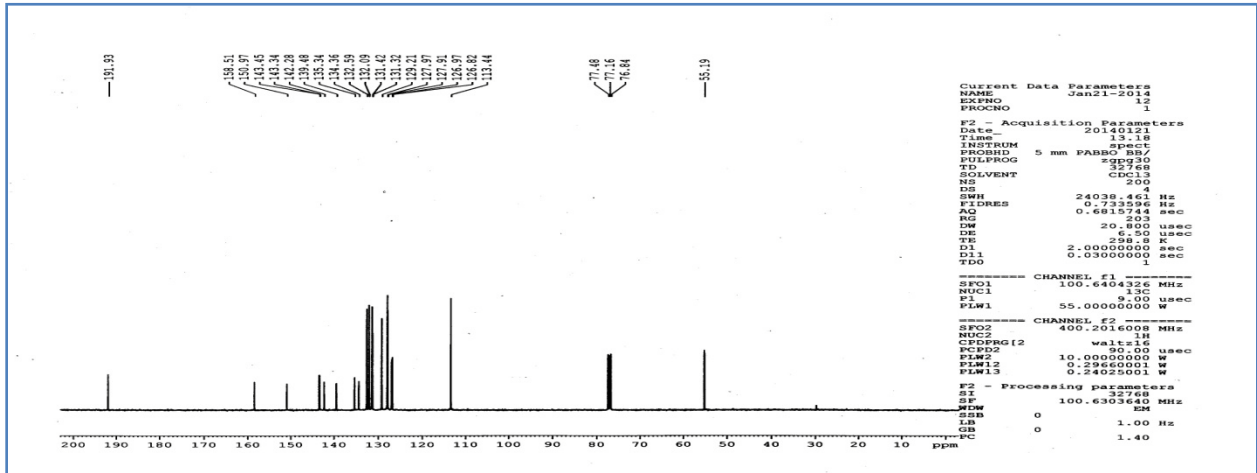

```

Current Data Parameters
NAME      Jan21-2014
EXPNO    12
PROCNO   1
F2 - Acquisition Parameters
Date_    20140121
Time     13:28
INSTRUM  spect
PROBHD   5 mm PABBO BB/
PULPROG  zgpg30
TD        32768
SOLVENT  CDCl3
NS        200
DS        4
SWH       24038.461 Hz
FIDRES    0.733596 Hz
AQ         0.6915744 sec
RG         203
DM         20.800 usec
DE         6.50 usec
TE         298.2 K
D1         2.00000000 sec
D11        0.03000000 sec
TDO        1
----- CHANNEL f1 -----
SFO1      100.626125 MHz
NUC1       13C
SI         9.00 usec
PLW1       55.00000000 W
----- CHANNEL f2 -----
SFO2      400.2016008 MHz
NUC2       1H
CPDPRG2   waltz16
PCPD2      80.00 usec
PLW2       10.00000000 W
PLW12      0.28660001 W
PLW13      0.24025001 W
F2 - Processing parameters
SI         32768
SF         100.6303640 MHz
WDW        EM
SSB         0
LB         1.00 Hz
GB         0
PC         1.40
    
```

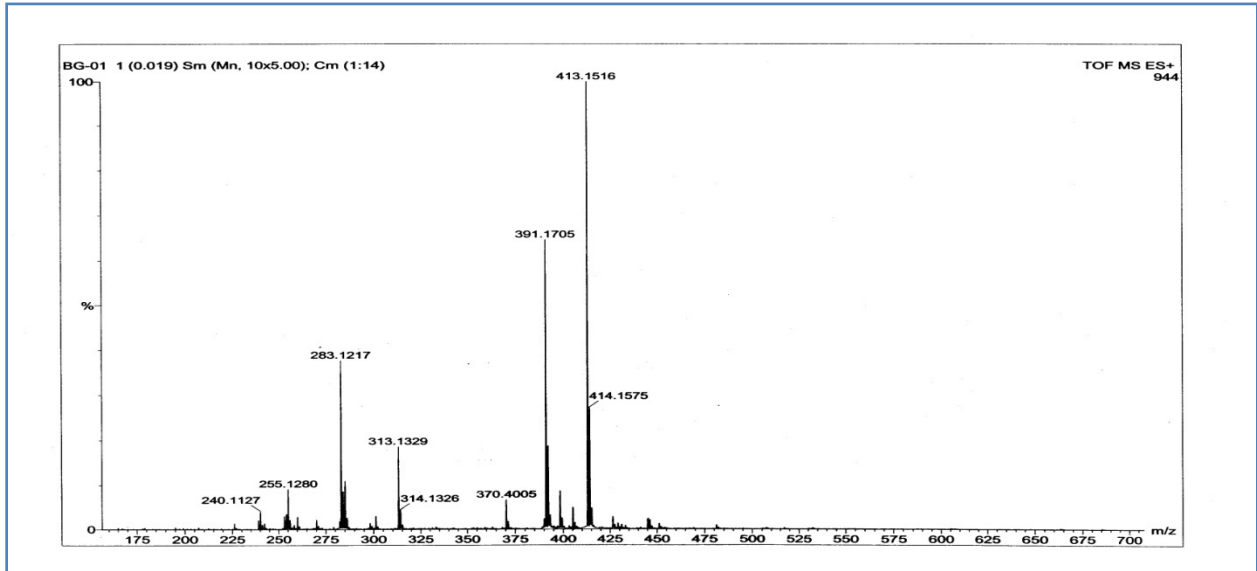

### Compound 2b:

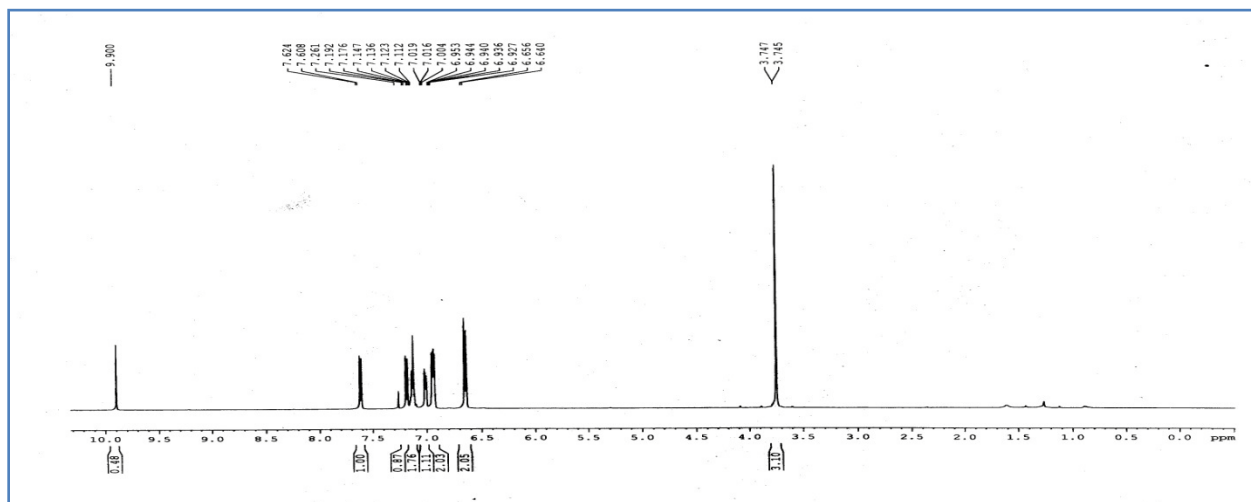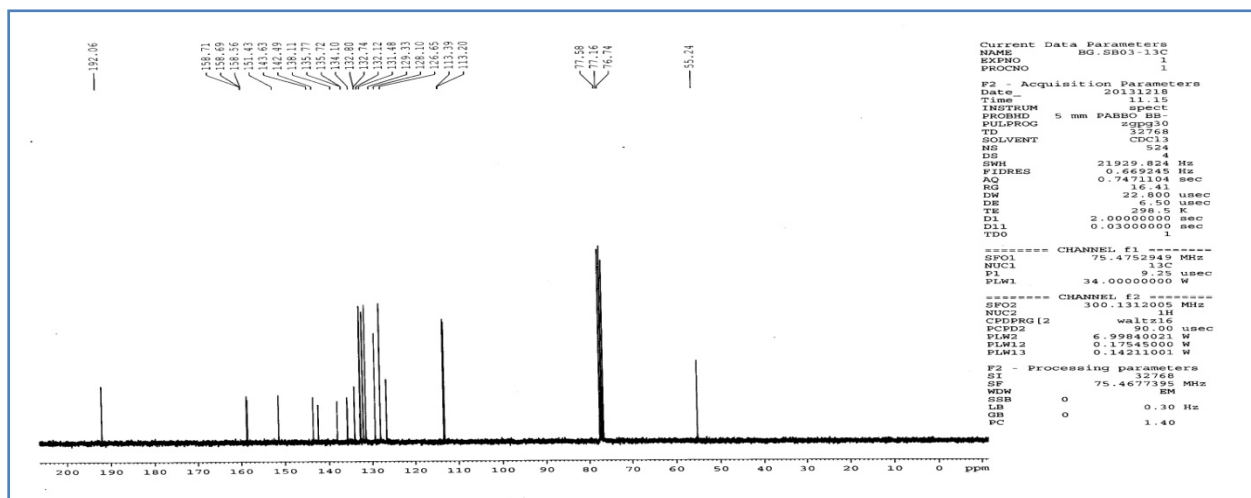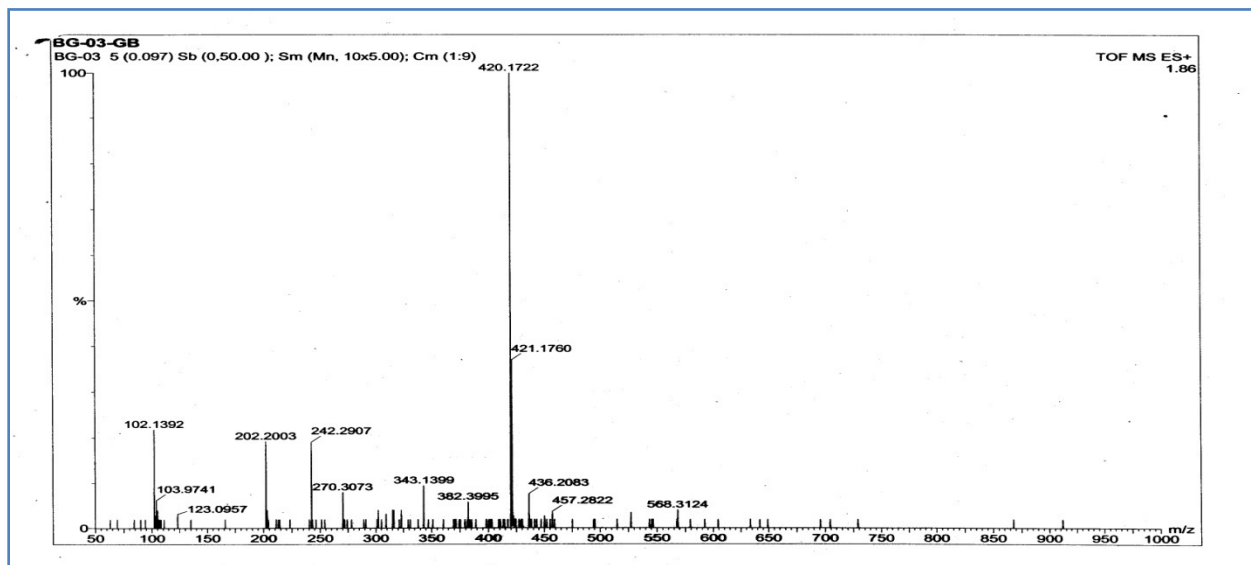



**Compound 3a:**

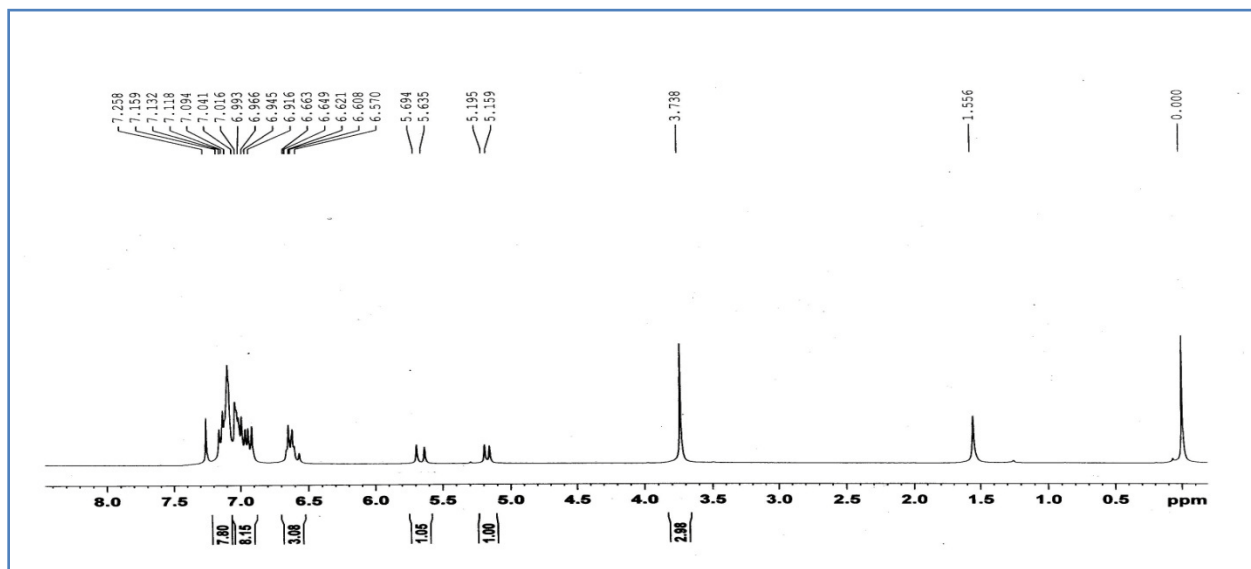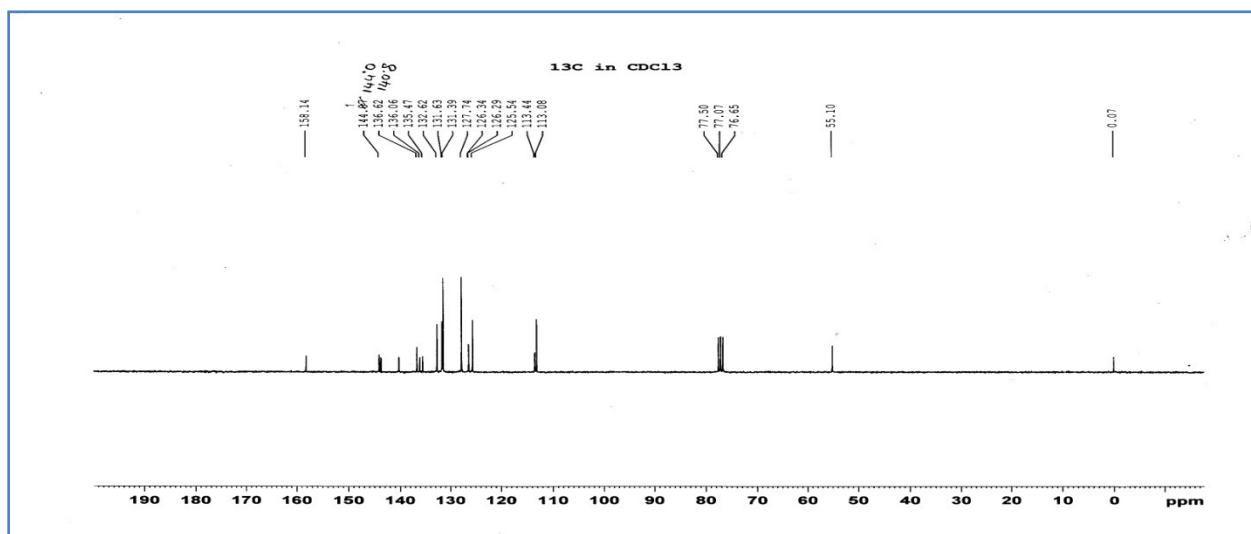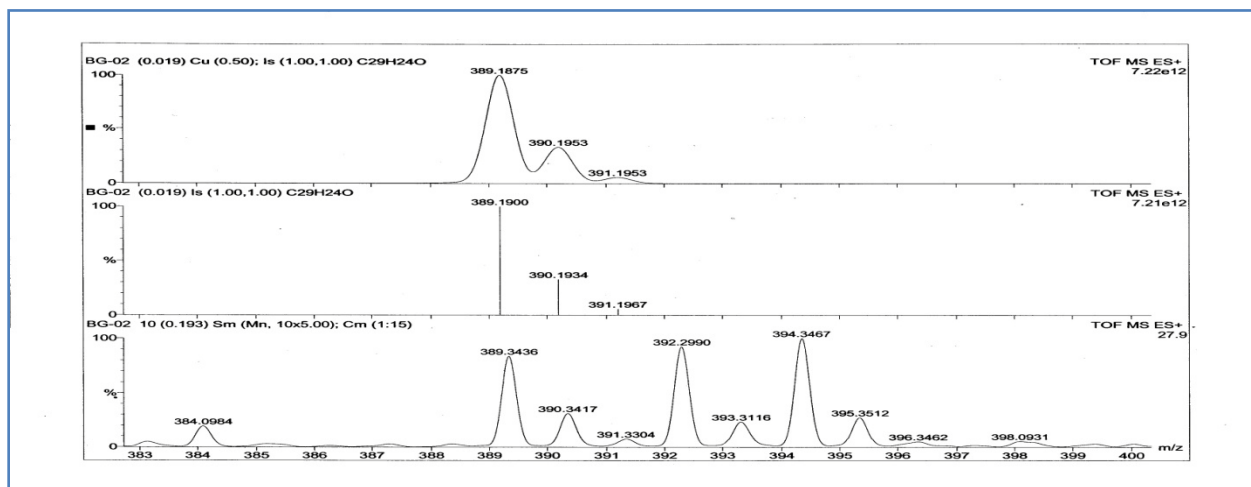





Compound 6:

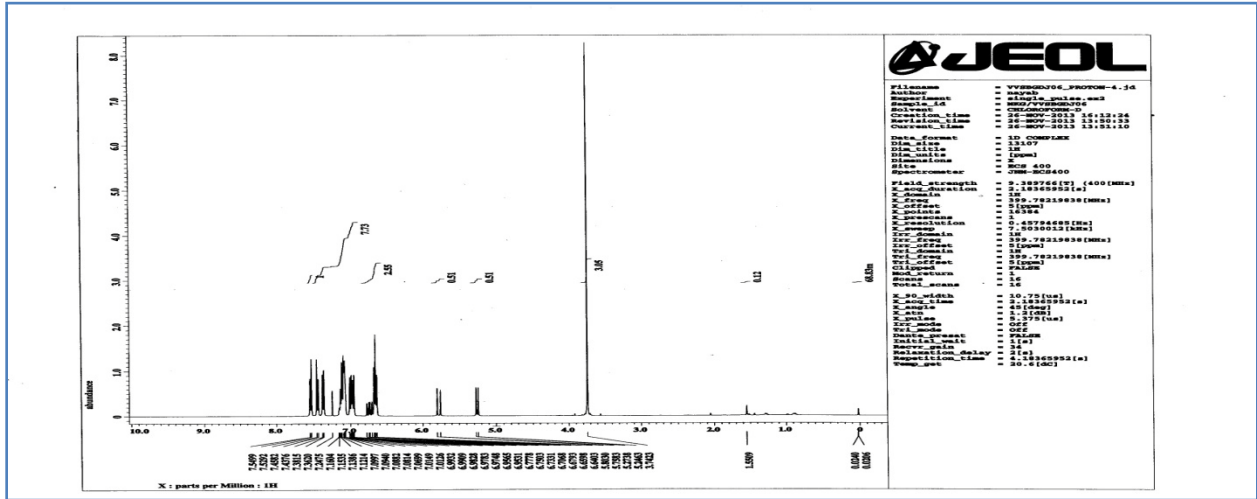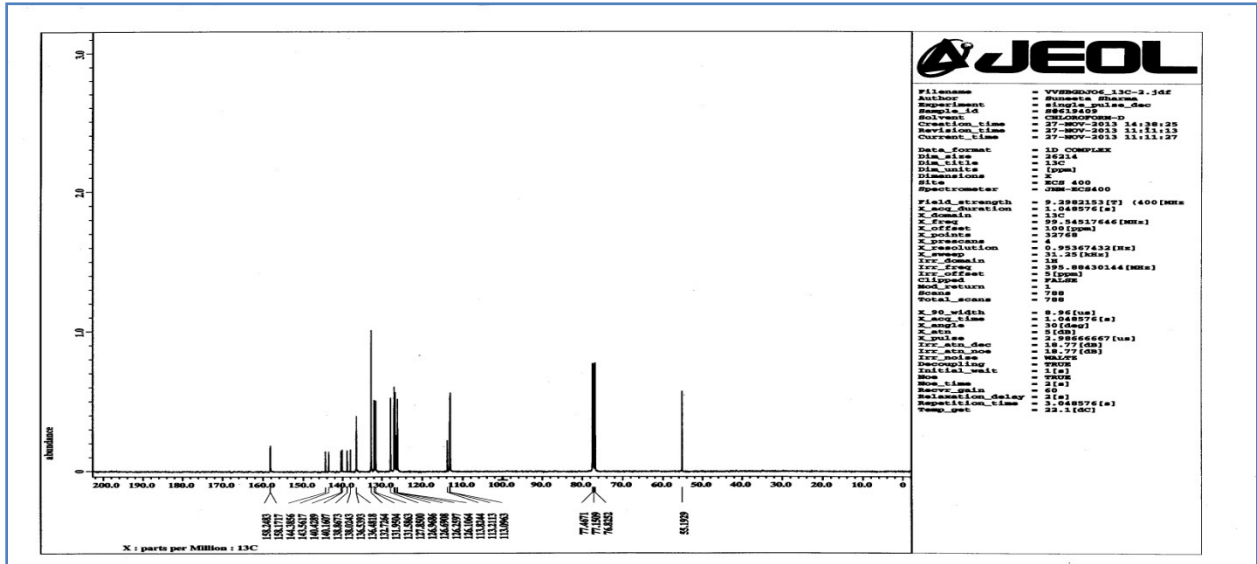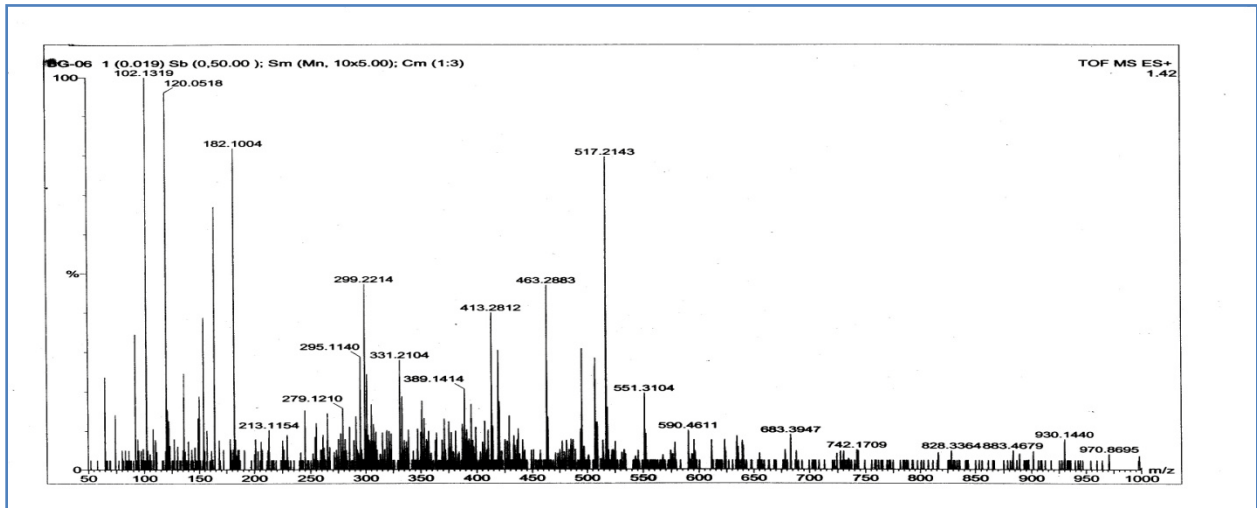

**Compound 7:**

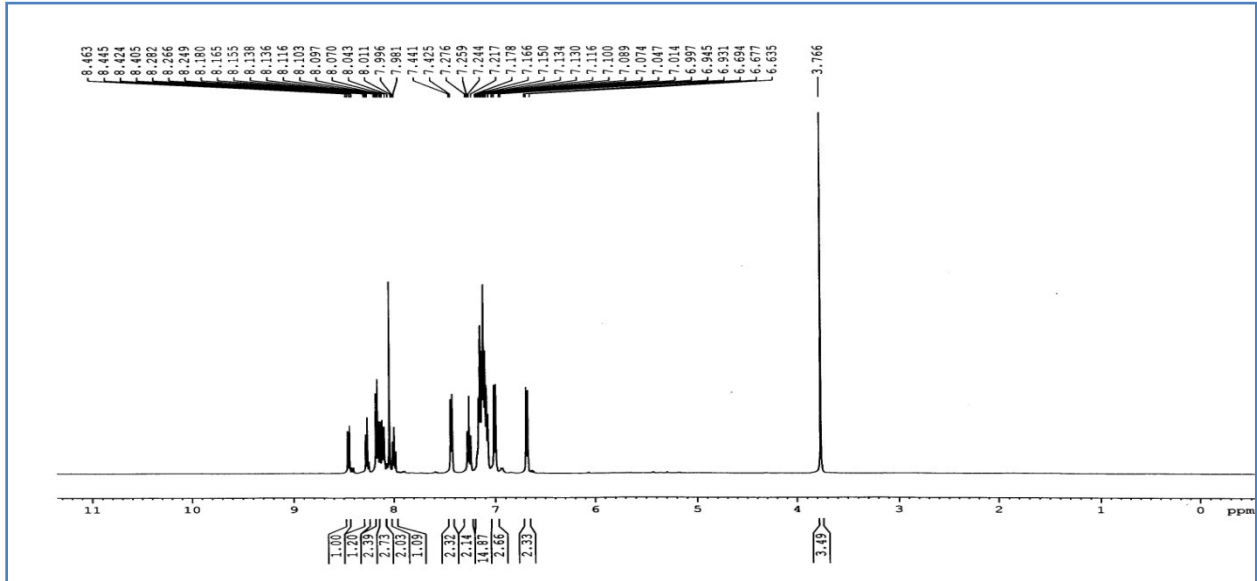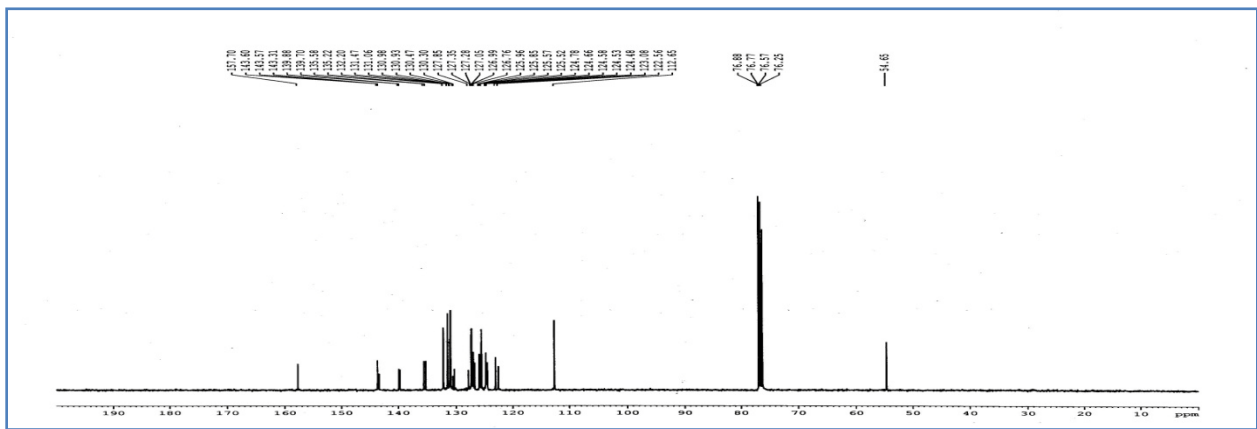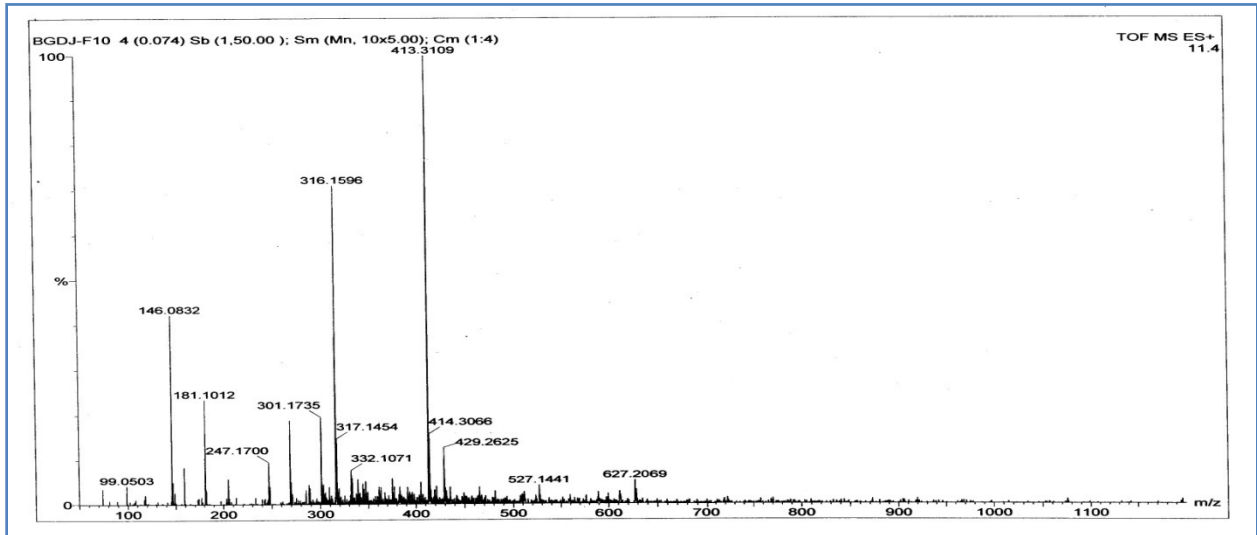

**Compound 8:**

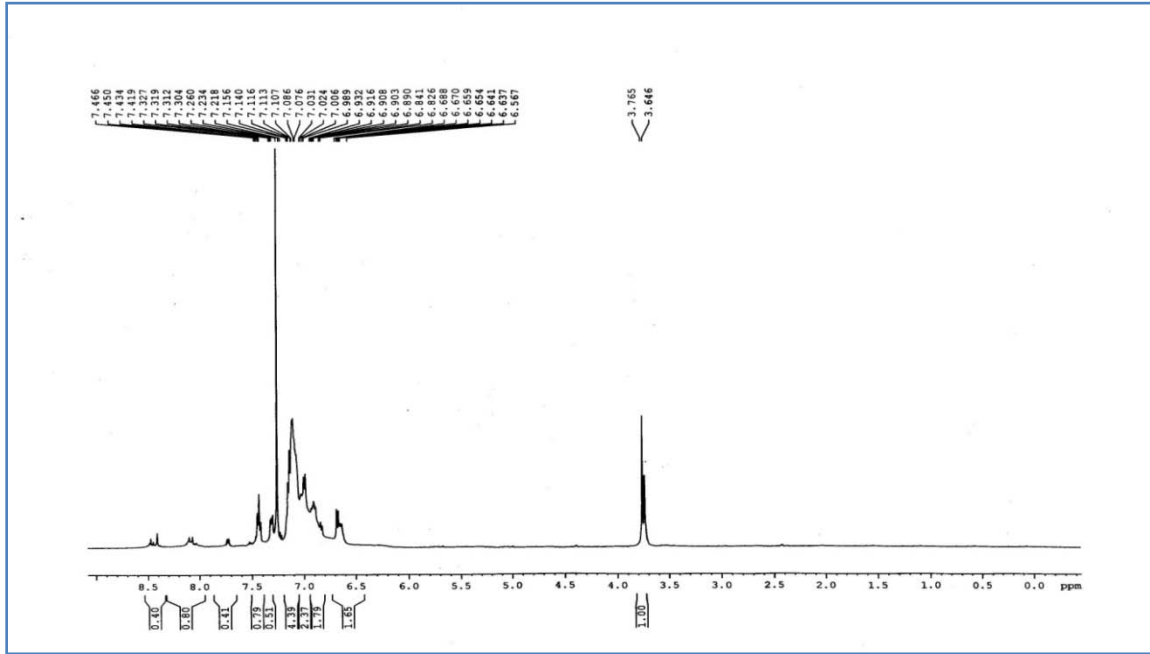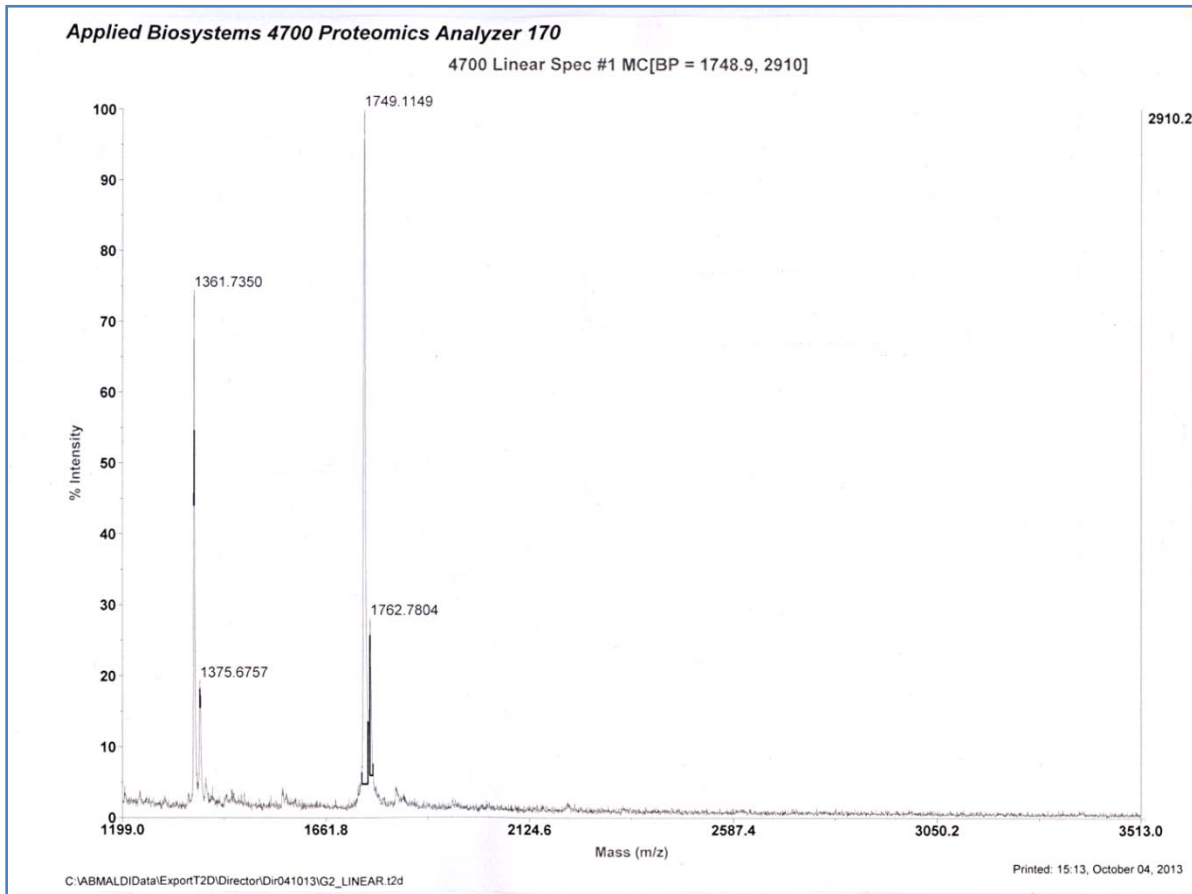

# Compound 9:

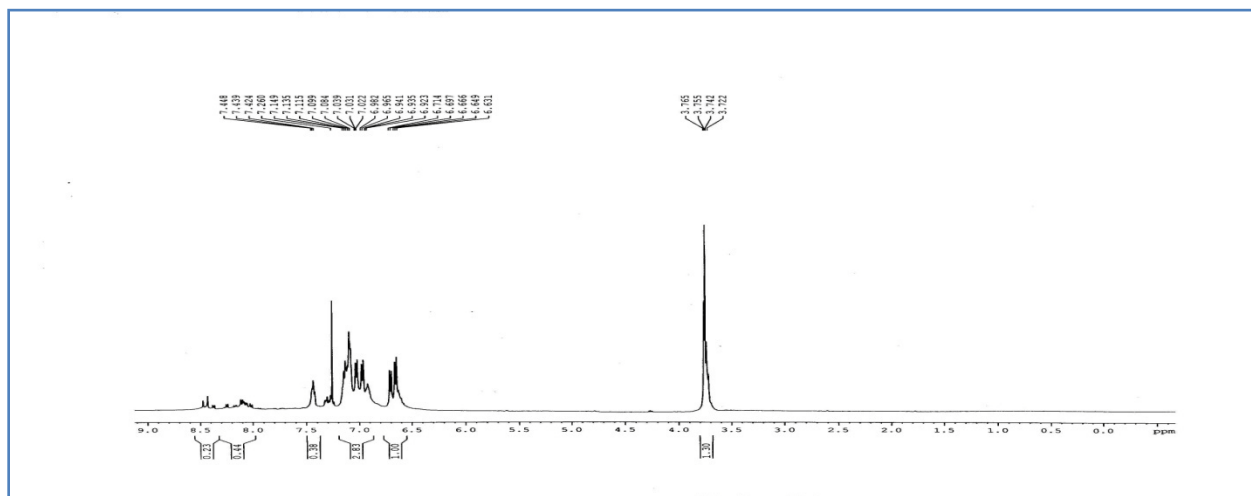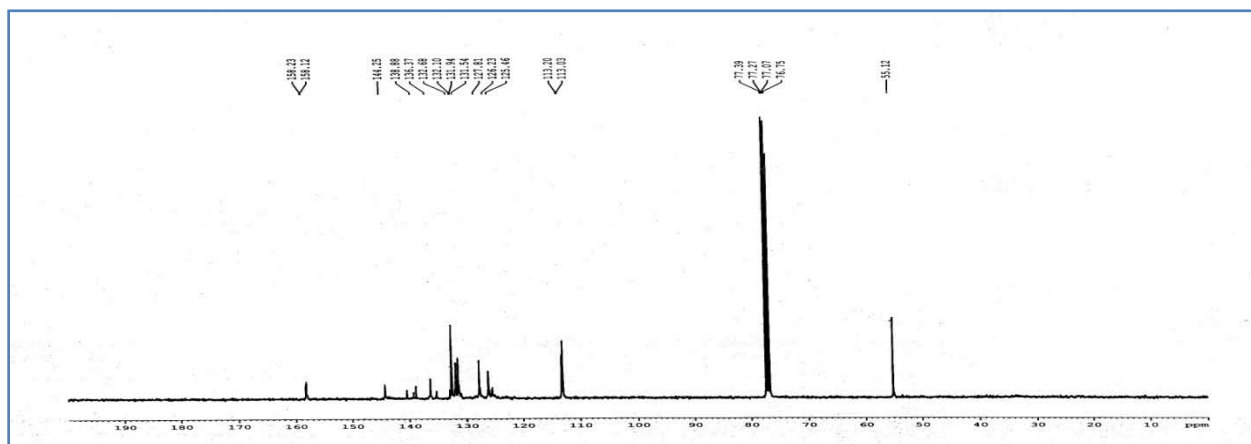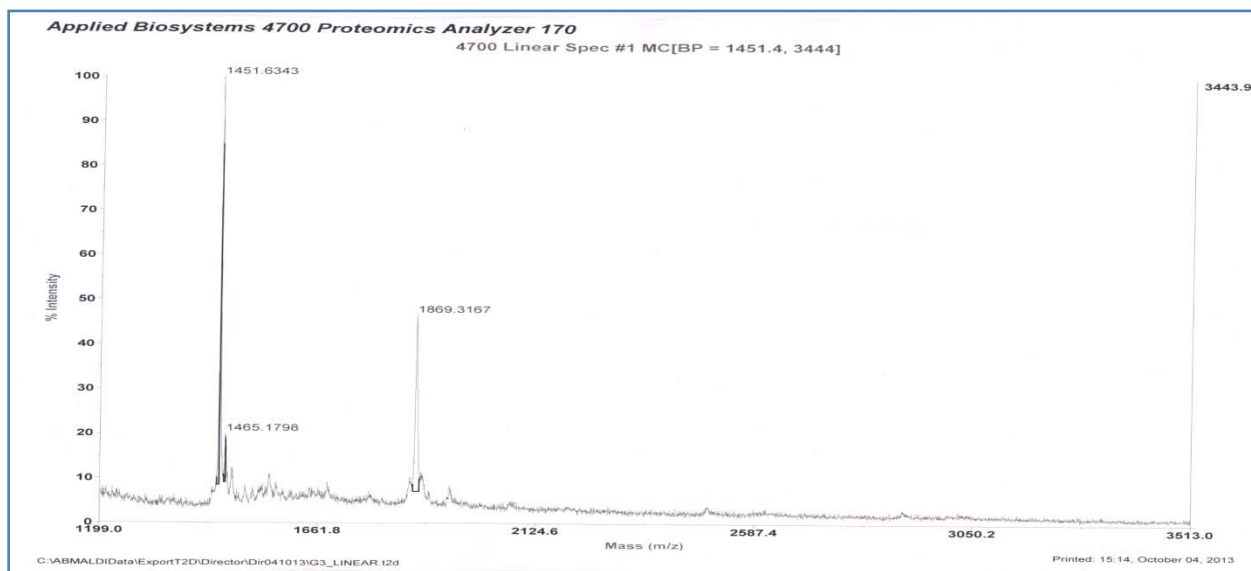

**Compound 10:**

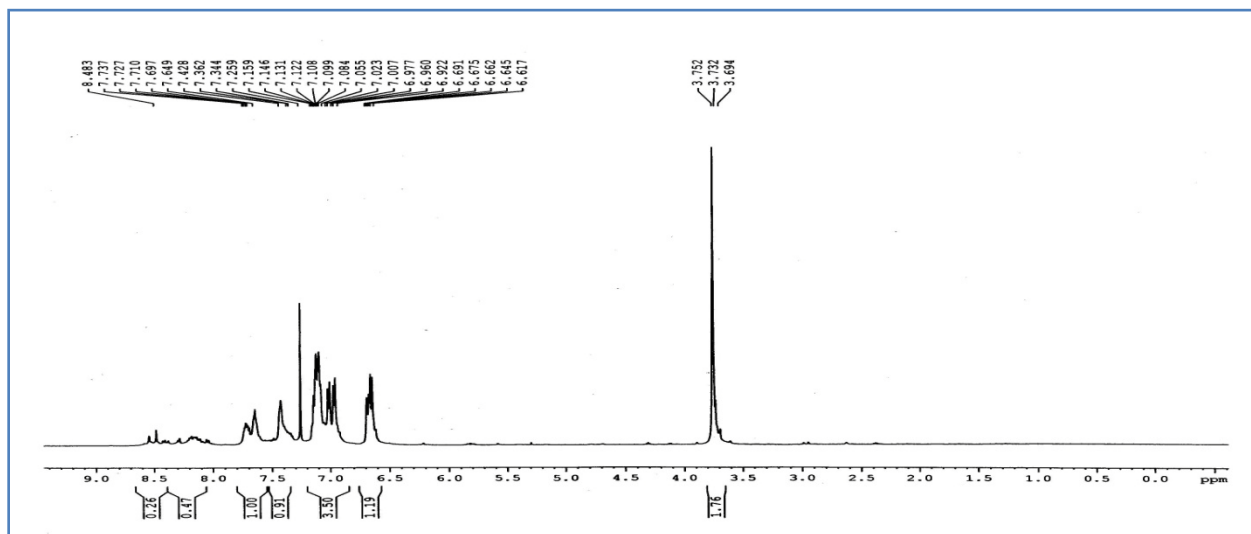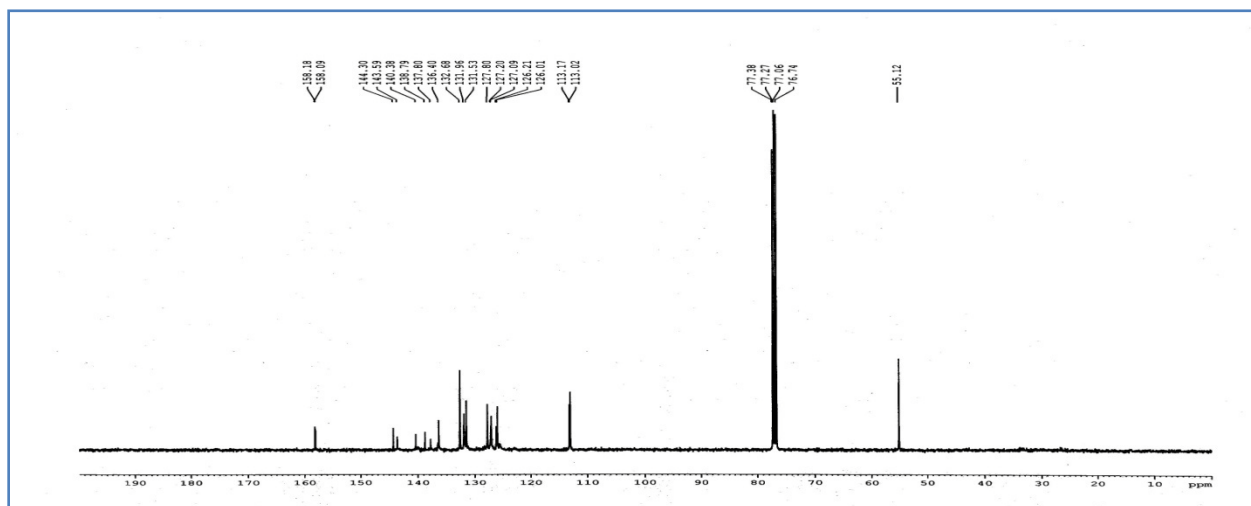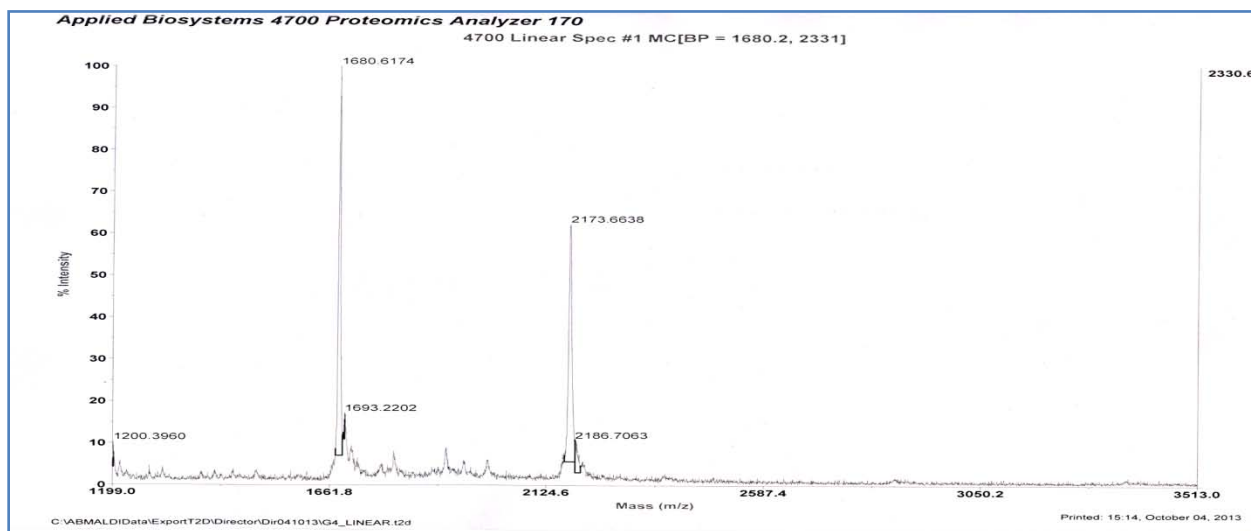

Supplement: c5ob01564b1.pdf [file c5ob01564b1.pdf]
